# Supplementary material
Source: ML conference proceedings conference paper supplement (https://openreview.net/forum?id=z7nS4MgMS7)

## Errors and Competence

### # Task 1: Error and Competency Detection

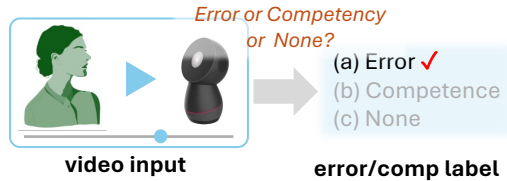

### # Task 2: Error Detection

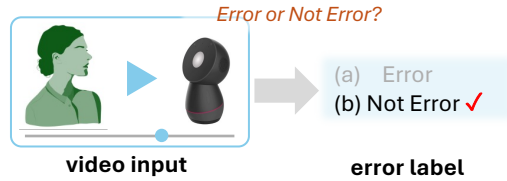

## Social Attribute

### # Task 3: Social Attribute Identification

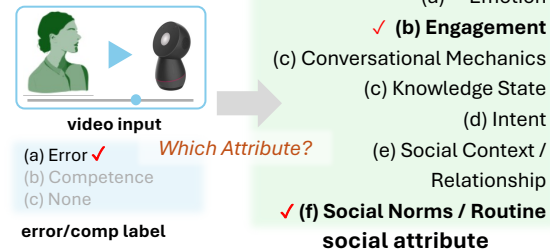

### # Task 4: Social Attribute Multiple Presence

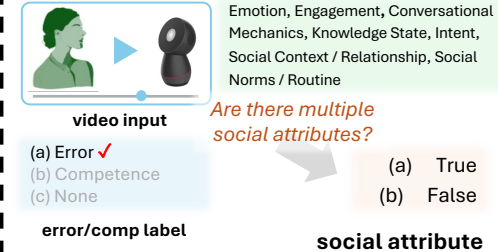

### # Task 5: Pre-Condition

## Interaction Progression

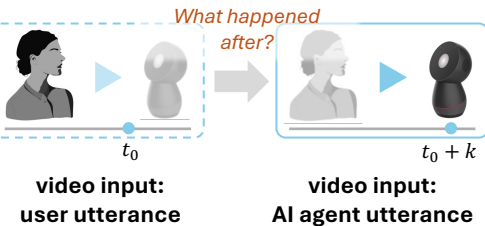

### # Task 6: Post-Condition

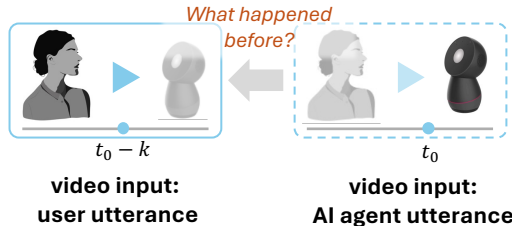

### # Task 7: Rationale QA

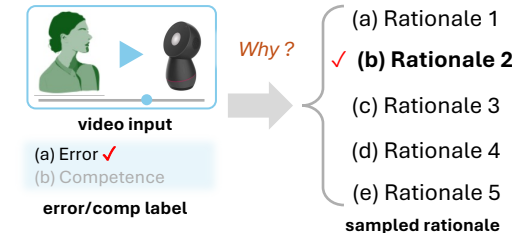

## Rationale & Correction

### # Task 8: Corrective Action QA

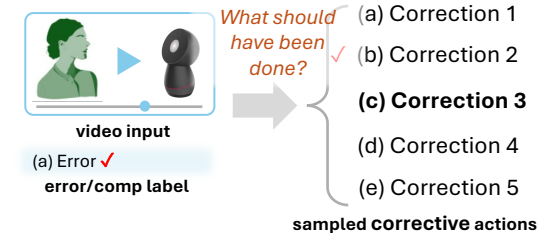

Supplement: supplementary_material [file task_figs_mar.pdf › ICLR_supp/code/images/task_figs_mar.pdf]
